# Supplementary material for: Effectiveness of a Web-Based Screening and Fully Automated Brief Motivational Intervention for Adolescent Substance Use: A Randomized Controlled Trial
Source: PubMed Central journal article supplement (PMC4897296; doi:10.2196/jmir.4643), 2016-05-24
Supplement: jmir_v18i5e103_app5.pdf [file jmir_v18i5e103_app5.pdf]

---

Multimedia appendix: Intervention effects at 3-month follow-up, ITT-analysis based on FIML (N=1449) <sup>a</sup>

---

|                              | <i>B</i> ( $\beta$ ) | <i>SE</i> | <i>P</i> |
|------------------------------|----------------------|-----------|----------|
| <hr/>                        |                      |           |          |
| Outcome Variable:            |                      |           |          |
| <hr/>                        |                      |           |          |
| Alcohol:                     |                      |           |          |
| AUDIT-C based drinking index | -0.72 (-0.13)        | 0.37      | .046*    |
| Drinking Frequency           | -0.13 (-0.08)        | 0.11      | .230     |
| Binge drinking Frequency     | -0.25 (-0.14)        | 0.18      | .059     |
| Drinking Quantity            | -0.22 (-0.08)        | 0.18      | .209     |
| Illegal drug use             |                      |           |          |
| Frequency                    | -0.03 (-0.04)        | 0.13      | .834     |

Note: All outcomes concern last 30 days. All analyses are adjusted for baseline scores, country of residence and parental educational attainment. Missing follow-up outcome values were estimated with FIML.

<sup>a</sup>AMOS does not provide confidence intervals for parameter estimates.

---
